# Supplementary material for: Dopamine Is a Siderophore-Like Iron Chelator That Promotes Salmonella enterica Serovar Typhimurium Virulence in Mice
Source: PubMed Central journal article supplement (PMC6428752; doi:10.1128/mbio.02624-18), 2019-02-05
Supplement: mBio.02624-18-s0001.pdf [file mBio.02624-18-s0001.pdf]

## 1 **Supplementary Material and Methods**

2

### 3 **Flow Cytometry Analysis**

4 For FACS analysis of murine macrophages, single-cell suspension of freshly isolated spleen and  
5 liver were collected. Cells were immunostained with the following antibodies:

6 PE-Fluor 610-anti-F4/80 (clone BM8, eBioscience), APC-anti-CD45 (clone A20, eBioscience),  
7 APC-Cyanine7-anti-CD11b (clone M1/70, eBioscience), PerCP-anti-Gr-1 (clone RB6-8C5,  
8 eBioscience), FITC-anti-Ly-6C (clone AL-21, BD Biosciences), PE-anti-CD71 (clone C2, BD  
9 Biosciences), Biotin-anti-CD49b (clone HMa2, eBioscience), Biotin-anti-CD19 (clone eBio1D3,  
10 eBioscience), Biotin-anti-CD3 (clone 17A2, BioLegend);

11 Fpn1 antibody was labeled with APEX Pacific Blue antibody labeling kit (Invitrogen). Secondary  
12 staining was accomplished with Streptavidin Pacific Orange conjugate (Invitrogen).

13 Cells were first gated using FSC/SSC characteristics, and doublets were excluded by comparing  
14 FSC-width and -area signals. Macrophages were identified as CD45<sup>+</sup>, Lin<sup>-</sup> (Lin = CD3, CD19,  
15 CD49b), Gr1<sup>-</sup>, CD11b<sup>low/dim</sup>, F4/80<sup>high</sup>, Fpn<sup>+</sup>.

16

17

18

19

20

21

22

23

24
