# Supplementary material for: Dopamine Is a Siderophore-Like Iron Chelator That Promotes Salmonella enterica Serovar Typhimurium Virulence in Mice
Source: PubMed Central journal article supplement (PMC6428752; doi:10.1128/mbio.02624-18), 2019-02-05
Supplement: mBio.02624-18-sf001.pdf [file mBio.02624-18-sf001.pdf]

1 Supplementary Figure 1:

2

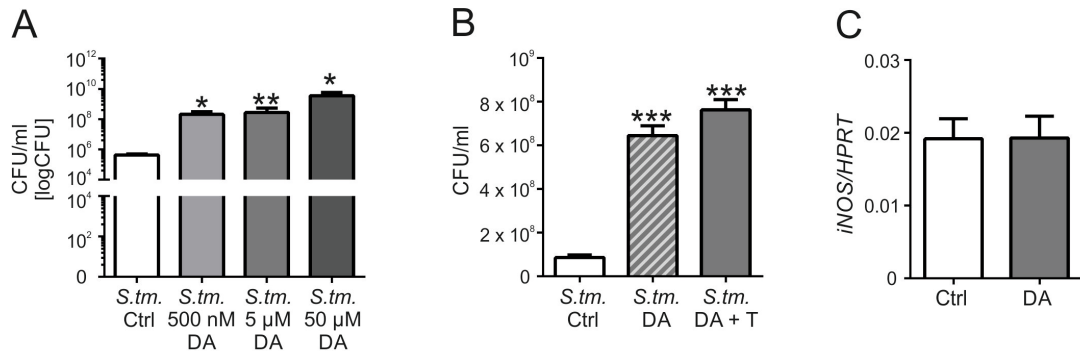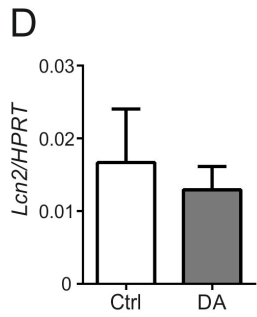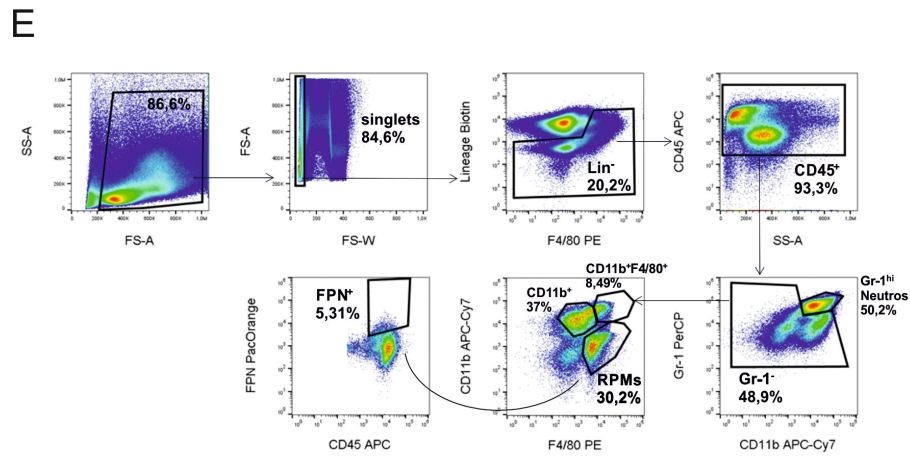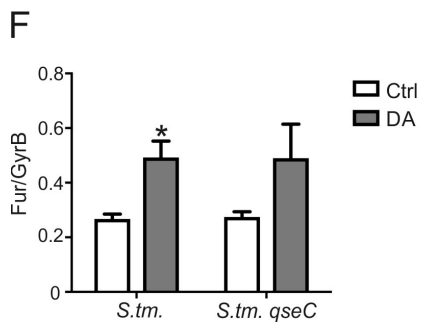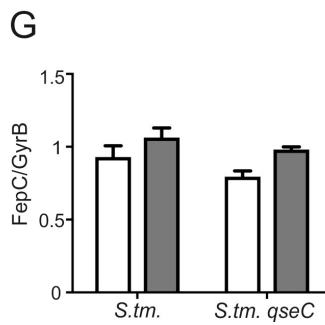

3

4

5 *S. Typhimurium* (*S. tm.*) was grown in the presence of 500 nM, 5  $\mu$ M, 50  $\mu$ M DA or solvent  
6 (Ctrl) for 12 h in DMEM medium and bacterial load determined by plating (n=2 independent  
7 experiments) (A). Values were log-transformed and the results compared by *t*-test. Superscripts  
8 indicate statistical significance compared to the control group. *S. tm.* was grown in the presence  
9 of 5  $\mu$ M DA (*S. tm.* DA), 5  $\mu$ M DA + 100 nM tranylcypropramine (*S. tm.* DA + T) or solvent (Ctrl)  
10 for 12 h in DMEM medium and bacterial load determined by plating (n=2 independent  
11 experiments) (B). Healthy wt mice were injected with DA or solvent (Ctrl) every 12 h and  
12 spleens analyzed for *iNOS* (C) and *Lcn2* (D) expression. Data were normalized for mRNA levels  
13 of *HPRT*. Wt mice were injected with DA or solvent (Ctrl) every 12 h and, where indicated, i.p.  
14 infected with *S. Typhimurium* (*S. tm.*). Cells were first gated using FSC/SSC characteristics and  
15 doublets were sequentially excluded by comparing FSC-width and -area signals (E). Red pulp  
16 macrophages (RPMs) were identified as CD45<sup>+</sup>, Lin<sup>-</sup> (Lin = CD3, CD19, CD49b) Gr1<sup>-</sup>,  
17 CD11b<sup>low/dim</sup>, F4/80<sup>high</sup>. *S. Typhimurium* (*S. tm.*) or an isogenic *qseC* mutant strain (*S. tm. qseC*)  
18 were grown in the presence of 5  $\mu$ M DA or solvent (Ctrl) for 12 h in DMEM medium and the  
19 expression of bacterial iron metabolic genes measured by qRT-PCR. Expression of *fur* (F) and  
20 *fepC* (G) was determined relative to the housekeeping gene *gyrB*. Superscripts indicate statistical  
21 significance compared to the control group.
